# Supplementary material for: Diversity and Evolutionary History of Iron Metabolism Genes in Diatoms
Source: PLoS One. 2015 Jun 8;10(6):e0129081. doi: 10.1371/journal.pone.0129081 (PMC4460010; doi:10.1371/journal.pone.0129081)
Supplement: S1 Table — For each gene investigated, this table lists the organism, source repository, accession #, experimental support if any, and PDB structure accession number if available. (XLSX) [file pone.0129081.s014.xlsx]

## Sheet: Sheet1
Gene	Organism	Source	Accession #	Support	PDB #
FTN	Pseudo-nitzschia multiseries	GB	ACI30660	crystal structure	3E6S
	Ulva Pertusa	GB	3VNX_A	crystal structure	3VNX
FLDA	Phaeodactylum tricornutum	UP	B7G203	genomic
	Thalassiosira oceanica	UP	K0RCB0	experimental ev
	Chondrus crispus	SP	P14070	crystal structure	2FCR
petF	Odontella sinensis	SP	P49522	experimental ev
	Thalassiosira weissflogii	SP	O98450	experimental ev
PETF	Thalassiosira oceanica	GB	EJK54785	experimental ev
	Cyanidioschyzon merolae	UP	Q85FT5	crystal structure	3AB5
	Chlorella fusca	SP	P56408	crystal structure	1AWD
PETE	Thalassiosira oceanica	SP	P84800	experimental ev
	Thalassiosira oceanica	UP	D2Z0I2	experimental ev
	Phormidium laminosum	SP	Q51883	crystal structure	1BAW
	Dryopteris crassirhizoma	PDB	1KDI	crystal structure	1KDI
CYTC6	Phaeodactylum tricornutum	SP	Q8GTB5	crystal structure	3DMI
	Thalassiosira oceanica	SP	K0T3B9	genomic
	Porphyra yezoensis	SP	Q8WKJ8	crystal structure	1GDV
CuZnSOD	Phaeodactylum_tricornutum	JGI	15852	genomic
	Aureococcus anophagefferens	UP	F0YCQ3
	Ectocarpus siliculosus	UP	D7FW94	genomic
	Spinacia oleracea	SP	P07505	crystal structure	1SRD
	Saccharomyces cerevisiae	SP	P00445	crystal structure	1SDY
FeSOD	Plasmodium falciparum	SP	Q8IAY6	crystal structure	2BPI
	Chlamydomonas reinhardtii	SP	Q42683	exp ev
	Arabidopsis thaliana	SP	P21276	exp ev
	Thalassiosira pseudonana	JGI	263062	genomic
MnSOD	Arabidopsis thaliana	SP	O81235	exp ev
	Phaeodactylum tricornutum	JGI	42832	genomic
	Thalassiosira pseudonana	JGI	40713	genomic
	Emiliania huxleyi	JGI	364889	genomic
NiSOD	Phaeodactylum tricornutum	JGI	49037	seq homology
	Ostreococcus lucimarinus	JGI	29162	seq homology
	Micromonas	JGI	64440	seq homology
	Streptomyces seoulensis	SP	P80734	crystal structure	1Q0D
